# Supplementary material for: Synthesis of Mixed Chitin Esters via Acylation of Chitin in Deep Eutectic Solvents
Source: MDPI journal article supplement (doi:10.3390/molecules28248132), 2023-12-16
Supplement: s1 [file s1]

## Supporting Information

# Synthesis of Mixed Chitin Esters via Acylation of Chitin in Deep Eutectic Solvents

Yusuke Egi and Jun-ichi Kadokawa\*

*Graduate School of Science and Engineering, Kagoshima University, 1-21-40 Korimoto, Kagoshima 890-0065, Japan*

\* E-mail: kadokawa@eng.kagoshima-u.ac.jp ; Tel.: +81-99-285-7743

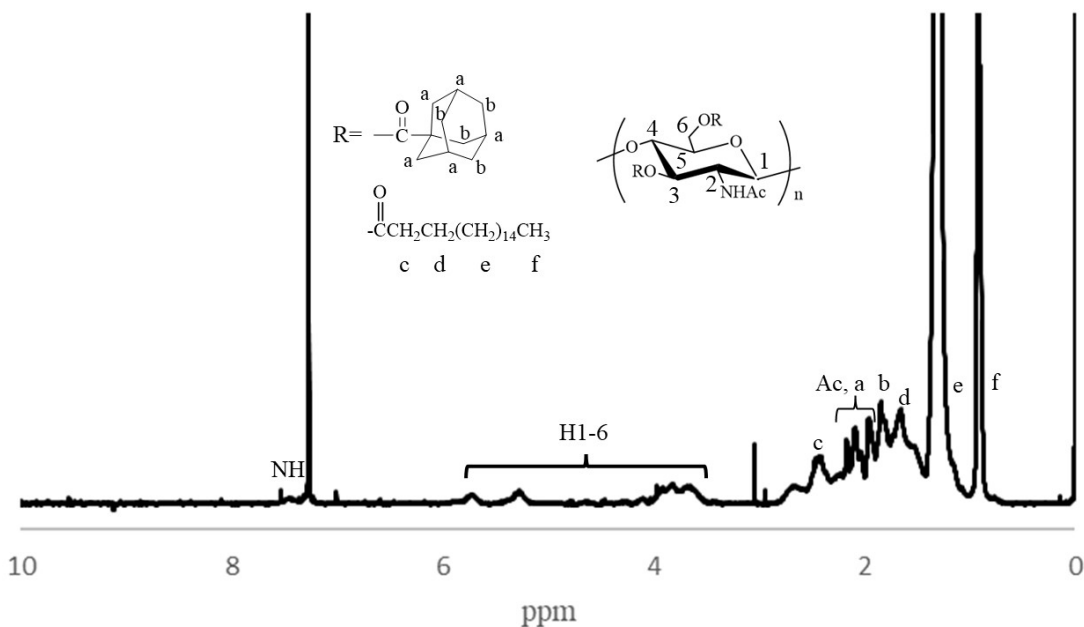

**Figure S1** of chitin adamantate stearate (entry 4, Table 1) in  $\text{CDCl}_3/\text{CF}_3\text{CO}_2\text{H}$  (2/1 in volume).

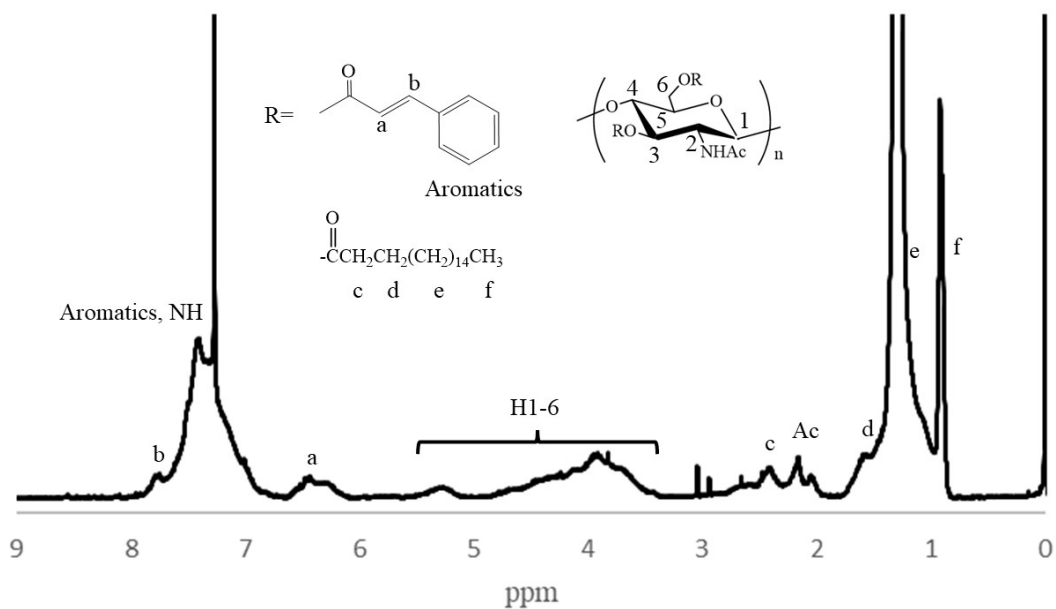

**Figure S2**  $^1\text{H}$  NMR spectrum of chitin cinnamate stearate (entry 6, Table 1) in  $\text{CDCl}_3/\text{CF}_3\text{CO}_2\text{H}$  (2/1 in volume).

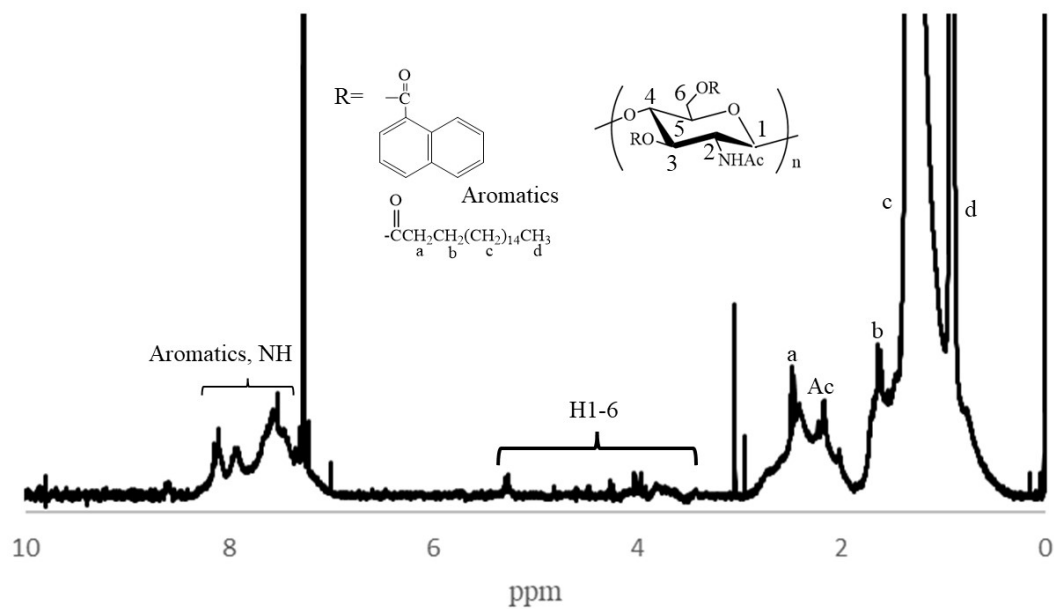

**Figure S3**  $^1\text{H}$  NMR spectrum of chitin 1-naphthoate stearate (entry 9, Table 1) in  $\text{CDCl}_3/\text{CF}_3\text{CO}_2\text{H}$  (2/1 in volume).
